# Supplementary material for: Computational Analysis of KRAS Mutations: Implications for Different Effects on the KRAS p.G12D and p.G13D Mutations
Source: PubMed Central journal article supplement (PMC3577811; doi:10.1371/journal.pone.0055793), 2013-02-20
Supplement: pone.0055793.s003.pdf [file pone.0055793.s003.pdf]

**(A)**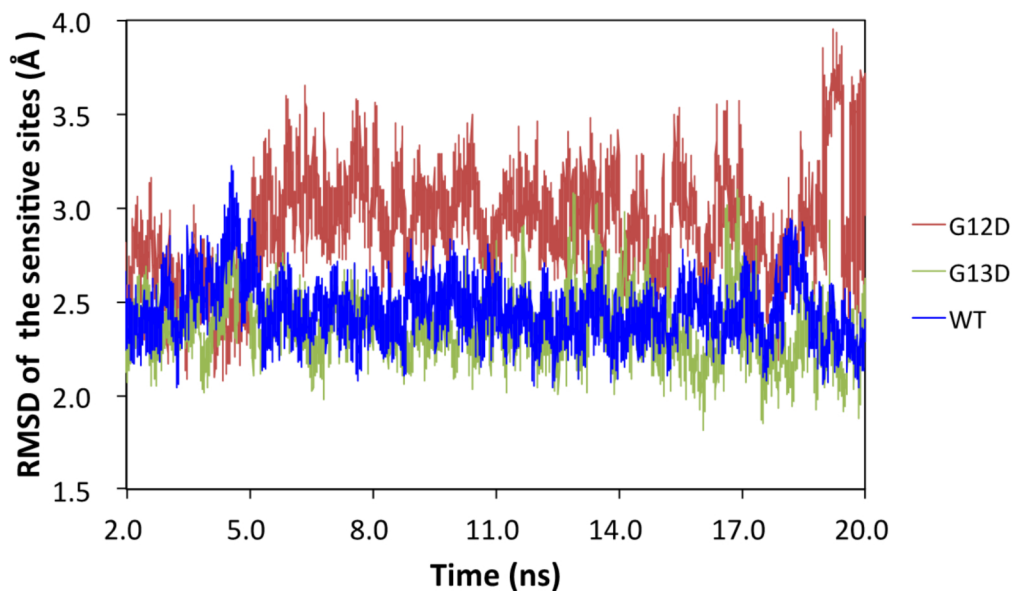**(B)**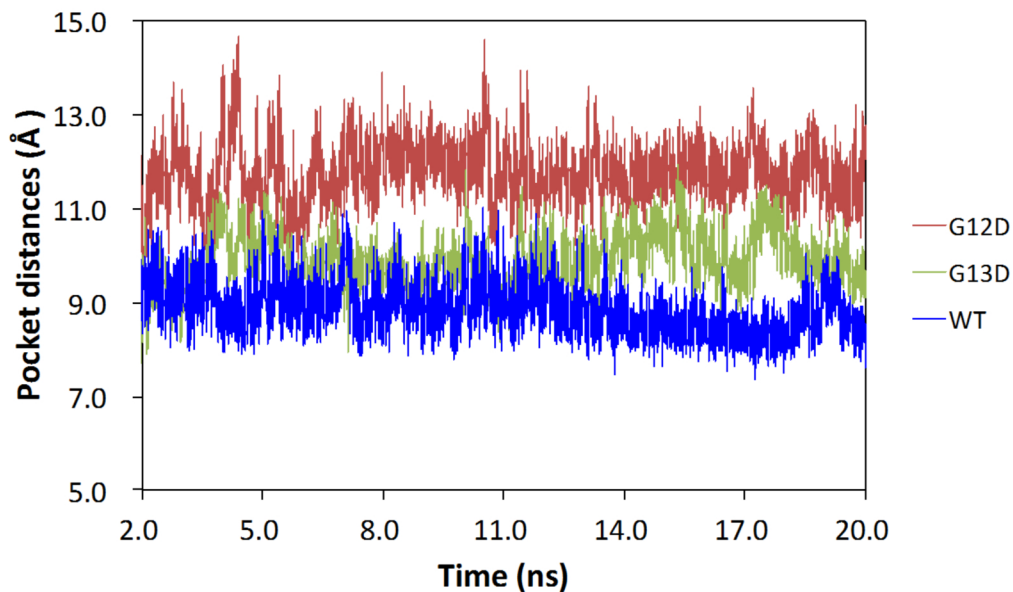

**Figure S3 – The second repeated molecular dynamics trajectories for:**

(A) Comparison of the RMSD plots of the sensitive sites (P-loop, switch I and II regions) of WT, G12D and G13D structures with respect to the initial conformation during the course of the simulation; (B) the pocket distances between the mass center of residues 12-13 and the mass center of residues 32-34 for WT, G12D, and G13D, respectively.
